# Supplementary material for: On the Effect of Standard Deviation of Cationic Radii on the Transition Temperature in Fluorite-Structured Entropy-Stabilized Oxides (F-ESO)
Source: MDPI journal article supplement (doi:10.3390/ma16062219), 2023-03-10
Supplement: s1 [file s1]

Supplementary Material

# On the effect of standard deviation of cationic radii on the transition temperature in Fluorite-structured Entropy-Stabilized Oxides (F-ESO)

Luca Spiridigliozzi <sup>1,\*</sup>, Mauro Bortolotti <sup>2</sup> and Gianfranco Dell'Agli <sup>1,3</sup>

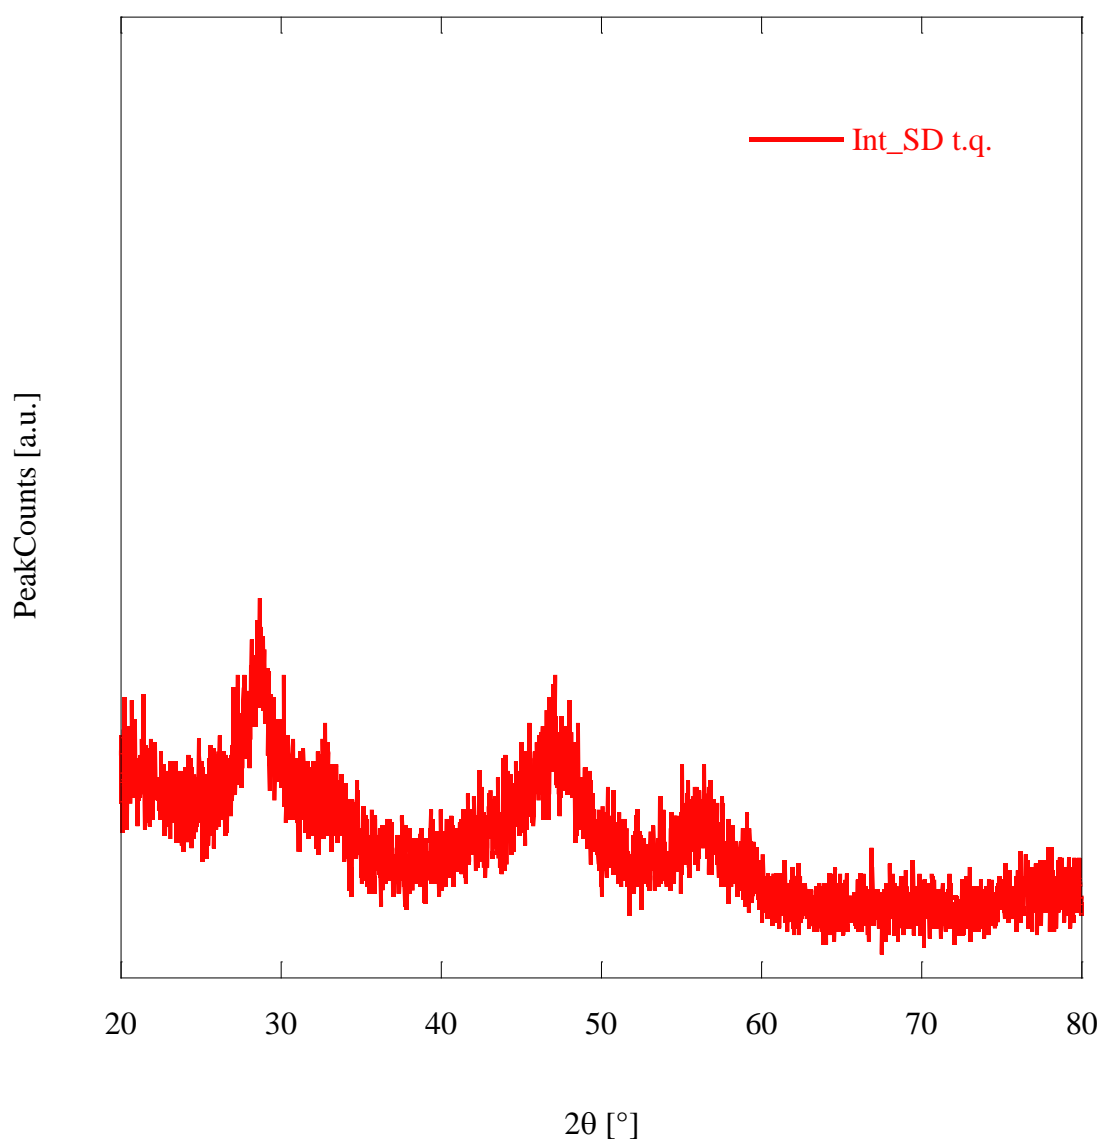

**Figure S1.** Diffraction pattern of as-prepared sample Int\_SD (t.q.).

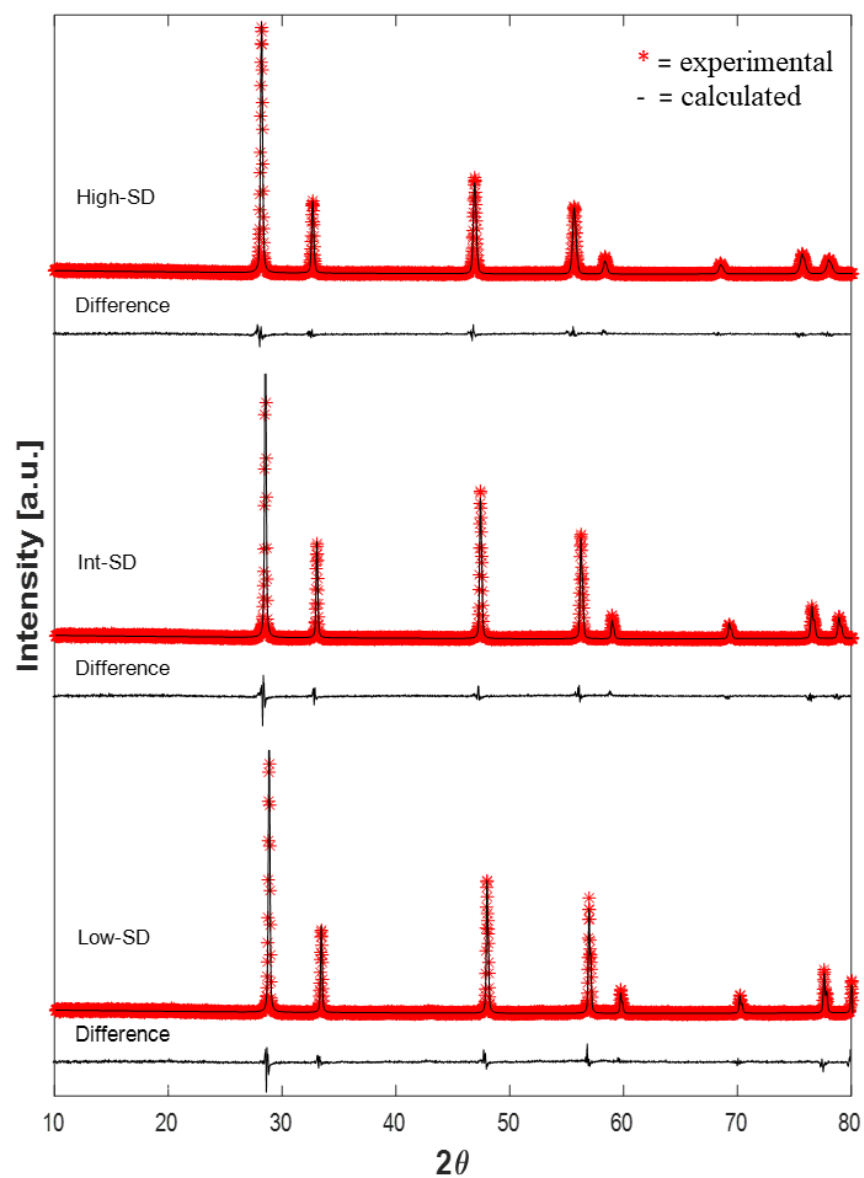

**Figure S2.** Rietveld refinements of High\_SD, Int\_SD, and Low\_SD
